# Supplementary material for: Spinal neural tube formation and tail development in human embryos
Source: eLife. 2024 Dec 5;12:RP88584. doi: 10.7554/eLife.88584 (PMC11620743; doi:10.7554/eLife.88584)
Supplement: Figure 1—source data 1. [file elife-88584-fig1-data1.xlsx]

## Sheet: Source data for Fig 1I,J
Source data for Figure 1 parts I and J
Measurements from photographic images of individual human embryos, as described in Materials & Methods
Embryo ID *	Embryo sex	Carnegie Stage	Somite no.	PNP length (pixels)	Somite length (pixels)	PNP/Somite length ratio
13446N	F	10	7	281.481	38.079	7.39203
42N	F	10	10	158.006	17.205	9.18373
480N	M	10	7	223.087	24.021	9.28717
509	M	10	8	292.15	24	12.1729
13468N	F	11	15	170	33.615	5.05727
65N	F	11	16	61.685	18.601	3.31622
988N	F	11	18	125.539	13.038	9.6287
13151	F	11	22	322.248	58.052	5.55102
1750N	M	11	16	137.208	42.048	3.26313
237N	M	11	19	77.621	15	5.17473
13433	M	11	20	290.084	42.72	6.79036
674N	M	11	21	181.838	33.526	5.42379
12264	F	12	17	213.937	53.666	3.98645
12108N	F	12	19	100.005	25.06	3.99062
11730N	F	12	21	80.61	34.176	2.35867
13879	F	12	23	126.132	47.381	2.66208
476N	F	12	23	46.957	19.105	2.45784
12267N	F	12	26	95.294	40.112	2.3757
86N	F	12	26	73.164	23.087	3.16906
428N	F	12	27	37.483	17.117	2.18981
548N	F	12	29	64.327	48.415	1.32866
12383	M	12	20	229.085	94.021	2.43653
12409	M	12	21	249.596	45.706	5.4609
668N	M	12	22	141.534	36.77	3.84917
213N	M	12	23	133.405	59.059	2.25884
678	M	12	25	92.087	33.242	2.7702
954N	M	12	26	118.36	54.489	2.17218
547N	M	12	28	93.536	34.482	2.7126
11943N	F	13	27	31.321	44.911	0.697402
462N	F	13	27	0	23.345	0
12436	F	13	29	88.023	61.984	1.42009
14099	F	13	29	0	40.262	0
12567	F	13	30	55.973	42.953	1.30312
13439	F	13	31	0	30.529	0
13731N	F	13	32	42.379	25.612	1.65465
1571N	F	13	33	0	30.61	0
13977	F	13	34	0	46.648	0
274N	M	13	25	95.771	25.02	3.82778
12460	M	13	30	60.828	55.109	1.10378
12524N	M	13	33	0	25.179	0
* ID numbers as allocated by the Human Developmental Biology Resource. Enquiries to hdbr@ucl.ac.uk
