# Supplementary material for: Spinal neural tube formation and tail development in human embryos
Source: eLife. 2024 Dec 5;12:RP88584. doi: 10.7554/eLife.88584 (PMC11620743; doi:10.7554/eLife.88584)
Supplement: Figure 4—source data 1. [file elife-88584-fig4-data1.xlsx]

## Sheet: Source data for Fig 4C-E
Source data for Figure 4 parts C and E
Quantification of total tail, neural tube (NT), notochord and tailgut areas (in square microns), and tailgut nuclear counts in three human embryos at CS14 (x2) and CS15
CS14-1 (ID: 16229 *)						CS14-2 (ID: 18165)						CS15 (ID: 16106)
Tail whole area	NT area	Notoch area	Tailgut area	Tailgut nuclei		Tail whole area	NT area	Notoch area	Tailgut area	Tailgut nuclei		Tail whole area	NT area	Notoch area	Tailgut area	Tailgut nuclei
20301.3						6867.84						3158.61
23183	5246.82					23385.3						11056.4
27857.5	4962.69	880.701	4613.07	62		30388.4	4471.42					18122.4	2595.95		3176.67	42
31595	7028.08	1015.06	4432.24	64		34918.7	4309.82	725.01	5081.41	53		18837.4	3123.12		2433.39	23
33703.2	7310.52	844.155	4366.01	61		33832.1	4320.91	733.249	5186.93	80		24379.4	3122.8	616.744	679.803	14
36473.8	8146.75	646.214	4304.96	47		36614.4	5768.71	922.106	3892.81	45		27750.1	3322.54	510.063	638.081	11
36411.1	8530.7	652.446	1522.48	24		43228.8	7724.46	815.636	2346.14	31		29966	3884.15	398.946	621.075	10
37669.7	7660.03	687.302	945.872	16		47841.2	7626.86	943.971	2431.38	27		31195.2	4534.48	395.566	548.616	11
38479.4	8431.52	931.19	853.767	13								34006.9	5356.67	387.961	715.821	12
40588.5	7913.43	685.506	985.059	14								35696.2	5732.16	523.794	658.572	12
												39740.2	6631.88	595.514	747.297	14
48076.9	9449.21	750.994	414.156	11								45267.5	7780.13	374.758	429.366	8
50055.5	9462.1	662.48	185.266	8								50848.7	8273.4	431.161	273.569	6
53940.8	10817.1	580.726	182.52	4								54133	8684.81	492.001	366.73	7
68546.8	11513.5	564.46	283.075	6
79775.4	10479.5	512.493	165.198	7
86569.6	16993.2	726.7	0	7
* ID numbers as allocated by the Human Developmental Biology Resource. Enquiries to hdbr@ucl.ac.uk
Values in bold show sections where NT is duplicated
